# Supplementary material
Source: PubMed Central journal article supplement (PMC7608953)
Supplement: ASN.2020060829SupplementaryData.pdf [file ASN.2020060829SupplementaryData.pdf]

## **Supplementary Appendix**

|                                                                                                            |   |
|------------------------------------------------------------------------------------------------------------|---|
| ISIC Investigators .....                                                                                   | 2 |
| Figure S1. Patient Selection Flowchart.....                                                                | 3 |
| Figure S2. ROC Curves for SuPAR and Admission eGFR .....                                                   | 4 |
| Table S1. Participating centers and number of patients included in the substudy.....                       | 5 |
| Table S2. Clinical characteristics and inflammatory biomarkers stratified by continent of enrollment ..... | 6 |
| Table S3. Clinical characteristics and inflammatory biomarkers stratified by suPAR tertiles.....           | 7 |
| Table S4. Correlation between suPAR and inflammatory biomarkers.....                                       | 8 |
| Table S5. Determinants of suPAR levels.....                                                                | 9 |

## **ISIC Investigators**

**University of Michigan in Ann Arbor, USA:** Salim S. Hayek\*, Penelope Blakely, Hanna Berlin, Tariq U. Azam, Husam Shadid, Michael Pan, Patrick O' Hayer, Chelsea Meloche, Rafey Feroze, Kishan J. Padalia, Elizabeth Anderson, Danny Perry, Abbas Bitar, Rayan Kaakati, Lili Zhao, Peiyao Zhao

**University of Copenhagen at Hvidovre Hospital, Denmark:** Jesper Eugen-Olsen\*, Izzet Altintas, Jens Tingleff, Marius Stauning, Morten Baltzer Houllind, Mette B Lindstrøm, Ove Andersen, Hejdi Gamst-Jensen, Line Jee Hartmann Rasmussen, Christian Rasmussen, Jan O Nehlin, Thomas Kallemose, Imran Parvaiz

**Attikon University Hospital in Athens, Greece:** Evangelos J. Giamarellos-Bourboulis\*, Maria-Evangelia Adami, Nicky Solomonidi, Maria Tsilika, Maria Saridaki, Vasileios Lekakis

**University Hospital Dusseldorf, Germany:** Sven Loosen\*, Tom Luedde, Verena Keitel

**University of Thessaly, Greece:** Athanasios Chalkias\*, Eleni Arnaoutoglou, Ioannis Pantazopoulos, Eleni Laou, Konstantina Kolonia, Anargyros Skoulakis

**Charité University Medicine Berlin, Germany:** Frank Tacke\*, Pinkus Tober-Lau, Raphael Mohr, Florian Kurth, Leif Erik Sander, Christoph Jochum

\*Site Principal Investigator

**Figure S1. Patient Selection Flowchart**

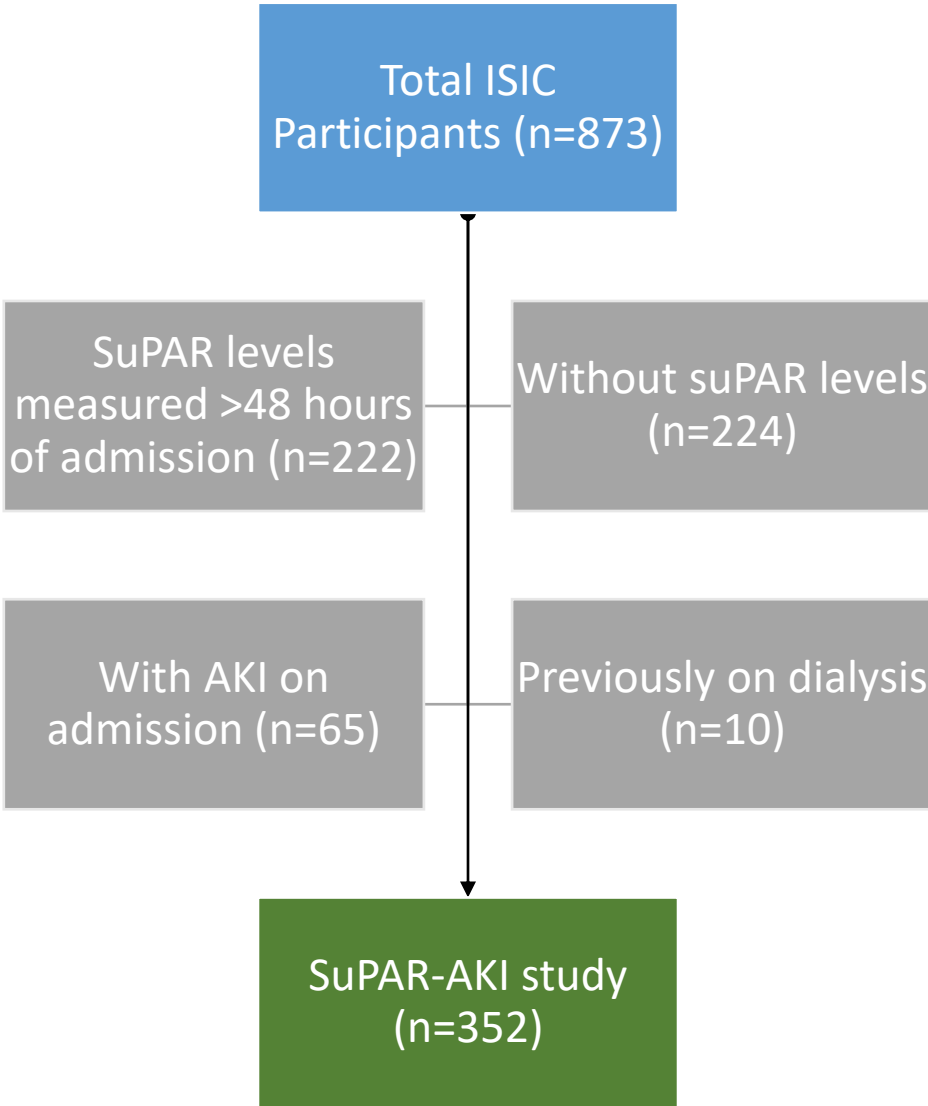

**Figure S2. ROC Curves for SuPAR and Admission eGFR**

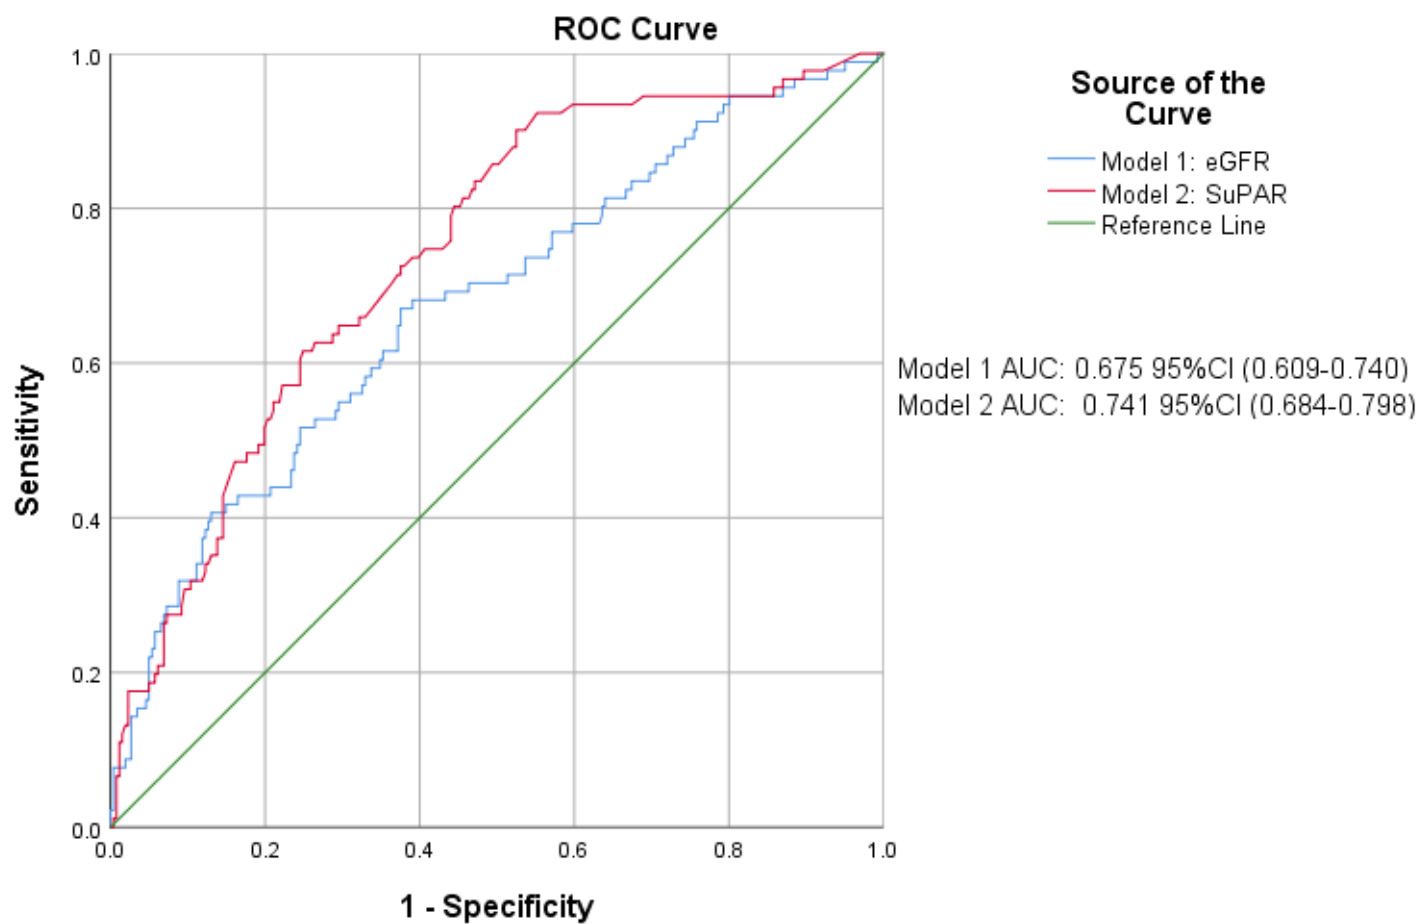

Admission eGFR and suPAR levels were included each in a separate model.

**Table S1. Participating centers and number of patients included in the substudy**

| <b>Institution</b>                            | <b>Number of patients included</b> |
|-----------------------------------------------|------------------------------------|
| University of Michigan in Ann Arbor, MI USA   | 148                                |
| University of Copenhagen at Hvidovre, Denmark | 91                                 |
| Attikon University Hospital in Athens, Greece | 61                                 |
| University Hospital of Dusseldorf, Germany    | 20                                 |
| University of Thessaly, Greece                | 20                                 |
| Charite de Berlin, Germany                    | 12                                 |
| Total                                         | 352                                |

**Table S2. Clinical characteristics and inflammatory biomarkers stratified by continent of enrollment**

|                                                                    | United States (n=148) | Europe (n=204)    | P-value <sup>b</sup> |
|--------------------------------------------------------------------|-----------------------|-------------------|----------------------|
| <b>Clinical Characteristics</b>                                    |                       |                   |                      |
| Age in years, mean (SD)                                            | 60 (16)               | 62 (17)           | 0.27                 |
| Male, n (%)                                                        | 76 (51.4%)            | 126 (61.8%)       | 0.051                |
| Black, n (%)                                                       | 48 (32.4%)            | 1 (0.5%)          | <0.001               |
| Body mass index kg/m <sup>2</sup> , mean (SD)                      | 32 (8)                | 2 (5)             | <0.001               |
| Diabetes mellitus, n (%)                                           | 50 (33.8%)            | 41 (20.1%)        | 0.004                |
| Hypertension, n (%)                                                | 85 (57.4%)            | 84 (42.2%)        | 0.003                |
| Coronary artery disease, n (%)                                     | 19 (12.8%)            | 15 (7.4%)         | 0.086                |
| Congestive heart failure, n (%)                                    | 22 (14.9%)            | 7 (3.4%)          | <0.001               |
| Admission eGFR ml/min/1.73 m <sup>2</sup> , mean (SD) <sup>a</sup> | 80 (29.08)            | 81 (26)           | 0.67                 |
| Admission eGFR<60 ml/min/1.73 m <sup>2</sup> , n (%) <sup>a</sup>  | 39 (26.4%)            | 51 (25.0%)        | 0.774                |
| Acute kidney injury, n (%)                                         | 53 (35.8%)            | 38 (18.6%)        | <0.001               |
| Oxygen saturation on admission, % (SD)                             | 93% (8)               | 95% (4)           | <0.001               |
| Required mechanical ventilation, n (%)                             | 38 (25.7%)            | 39 (19.1%)        | 0.142                |
| Required dialysis, n (%)                                           | 6 (4.1%)              | 19 (9.3%)         | 0.058                |
| <b>Biomarkers<sup>c</sup></b>                                      |                       |                   |                      |
| SuPAR pg/ml, median (IQR)                                          | 6.19 (4.95-8.44)      | 5.00 (3.43-7.00)  | <0.001               |
| C-reactive protein mg/dl, median (IQR)                             | 10.00 (4.60-19.30)    | 4.65 (1.50-10.13) | <0.001               |
| Ferritin ng/ml, median (IQR)                                       | 606 (263-1350)        | 455 (204-624)     | 0.004                |
| D-dimer mg/L, median (IQR)                                         | 1.085 (0.62-1.94)     | 0.39 (0.25-0.63)  | <0.001               |
| Lactate dehydrogenase IU/L, median (IQR)                           | 400 (272-589)         | 270 (200-366)     | <0.001               |

<sup>a</sup>Calculated using the Chronic Kidney Disease Epidemiology Collaboration equation. <sup>b</sup>P-value for the comparison between groups with and without acute kidney injury. Abbreviations: eGFR: estimated glomerular filtration rate; IQR: interquartile range; IU: international units SD: standard deviation. <sup>c</sup>C-reactive protein levels were available in 301 participants, ferritin in 207 participants, D-dimer in 204 participants and lactate dehydrogenase in 256 participants.

**Table S3. Clinical characteristics and inflammatory biomarkers stratified by suPAR tertiles**

|                                                                    | SuPAR Tertiles       |                         |                     | P-value <sup>b</sup> |
|--------------------------------------------------------------------|----------------------|-------------------------|---------------------|----------------------|
|                                                                    | < 4.60 ng/ml (n=117) | 4.60-6.86 ng/ml (n=117) | >6.86 ng/ml (n=118) |                      |
| <b>Clinical Characteristics</b>                                    |                      |                         |                     |                      |
| Age in years, mean (SD)                                            | 55 (16)              | 61 (16)                 | 67 (15)             | <0.001               |
| Male, n (%)                                                        | 65 (55.6%)           | 64 (54.7%)              | 73 (61.9%)          | 0.479                |
| Black, n (%)                                                       | 8 (6.8%)             | 19 (16.2%)              | 22 (18.6%)          | 0.022                |
| Body mass index kg/m <sup>2</sup> , mean (SD)                      | 29 (7)               | 30 (7)                  | 31 (8)              | 0.029                |
| Diabetes mellitus, n (%)                                           | 14 (12.0%)           | 26 (22.2%)              | 51 (43.2%)          | <0.001               |
| Hypertension, n (%)                                                | 42 (35.9%)           | 52 (44.4%)              | 75 (63.6%)          | <0.001               |
| Coronary artery disease, n (%)                                     | 9 (7.7%)             | 8 (6.8%)                | 17 (14.4%)          | 0.099                |
| Congestive heart failure, n (%)                                    | 3 (2.6%)             | 5 (4.3%)                | 21 (17.8%)          | <0.001               |
| Admission eGFR ml/min/1.73 m <sup>2</sup> , mean (SD) <sup>a</sup> | 90 (20)              | 81 (26)                 | 70 (30)             | <0.001               |
| Admission eGFR<60 ml/min/1.73 m <sup>2</sup> , n (%) <sup>a</sup>  | 12 (10.3%)           | 27 (23.1%)              | 51 (43.2%)          | <0.001               |
| Acute kidney injury, n (%)                                         | 7 (6.0%)             | 30 (25.6%)              | 54 (45.8%)          | <0.001               |
| Oxygen saturation on admission, % (SD)                             | 96 (3)               | 95 (4)                  | 91 (8)              | <0.001               |
| Required mechanical ventilation, n (%)                             | 3 (2.6%)             | 21 (17.9%)              | 53 (44.9%)          | <0.001               |
| Required dialysis, n (%)                                           | 1 (0.9%)             | 5 (4.3%)                | 19 (16.1%)          | <0.001               |
| <b>Biomarkers<sup>c</sup></b>                                      |                      |                         |                     |                      |
| SuPAR pg/ml, median (IQR)                                          | 3.20 (2.57-4.00)     | 5.60 (5.10-6.00)        | 9.07 (7.87-11.40)   | <0.001               |
| C-reactive protein mg/dl, median (IQR)                             | 3.50 (0.80-6.20)     | 6.70 (4.10-11.50)       | 12.50 (4.70-19.80)  | <0.001               |
| Ferritin ng/ml, median (IQR)                                       | 268 (169-554)        | 486 (262-847)           | 911 (332-1535)      | <0.001               |
| D-dimer mg/L, median (IQR)                                         | 0.521 (0.366-0.748)  | 0.725 (0.40-1.28)       | 1.10 (0.550-2.490)  | <0.001               |
| Lactate dehydrogenase IU/L, median (IQR)                           | 240 (195-312)        | 323 (253-477)           | 438 (311-614)       | <0.001               |

<sup>a</sup>Calculated using the Chronic Kidney Disease Epidemiology Collaboration equation. <sup>b</sup>P-value for the ANOVA for normally distributed continuous variables, Kruskal Wallis test for non-normally distributed continuous variables, and chi-square test for categorical variables. Abbreviations: AKI: acute kidney injury; eGFR: estimated glomerular filtration rate; IQR: interquartile range; IU: international units SD: standard deviation. <sup>c</sup>C-reactive protein levels were available in 301 participants, ferritin in 207 participants, D-dimer in 204 participants and lactate dehydrogenase in 256 participants.

**Table S4. Correlation between suPAR and inflammatory biomarkers**

|                       |                         | SuPAR  |
|-----------------------|-------------------------|--------|
| C-reactive protein    | Correlation Coefficient | 0.465  |
|                       | P-value. (2-tailed)     | <0.001 |
|                       | N                       | 301    |
| Ferritin              | Correlation Coefficient | 0.320  |
|                       | P-value. (2-tailed)     | <0.001 |
|                       | N                       | 207    |
| D-dimer               | Correlation Coefficient | 0.314  |
|                       | P-value. (2-tailed)     | <0.001 |
|                       | N                       | 204    |
| Lactate dehydrogenase | Correlation Coefficient | 0.486  |
|                       | P-value. (2-tailed)     | <0.001 |
|                       | N                       | 256    |



**Table S5. Determinants of suPAR levels**

|                                                     | SuPAR (log-base 2)    |         |
|-----------------------------------------------------|-----------------------|---------|
|                                                     | $\beta$ , 95%CI       | P-value |
| <b>Model 0: Clinical Characteristics</b>            |                       |         |
| Age, per 10 years                                   | 0.01 (0.01 – 0.02)    | 0.006   |
| Male                                                | -0.13 (-0.29 – 0.03)  | 0.10    |
| Black                                               | -0.01 (-0.25 – 0.25)  | 0.99    |
| Institution (US vs. Europe)                         | -0.31 (-0.50 – -0.12) | 0.001   |
| Body mass index, per 5 kg/m <sup>2</sup>            | -0.01 (-0.07 – 0.05)  | 0.75    |
| Diabetes mellitus                                   | 0.23 (0.03 – 0.43)    | 0.022   |
| Hypertension                                        | -0.08 (-0.27 – 0.12)  | 0.44    |
| Coronary artery disease                             | 0.01 (-0.29 – 0.31)   | 0.94    |
| Congestive heart failure                            | 0.38 (0.06 – 0.69)    | 0.019   |
| eGFR, per 5 ml/min/1.73 m <sup>2</sup> <sup>b</sup> | -0.02 (-0.04 – 0.004) | 0.11    |
| Oxygen saturation, per 1 %                          | -0.02 (-0.04 – 0.01)  | 0.001   |
| <b>Models 1-4: Biomarkers<sup>a</sup></b>           |                       |         |
| C-reactive protein, per 100% increase               | 0.14 (0.10-0.18)      | <0.001  |
| Ferritin, per 100% increase                         | 0.09 (0.03-0.14)      | 0.003   |
| D-dimer, per 100% increase                          | 0.13 (0.07-0.19)      | <0.001  |
| Lactate dehydrogenase, per 100% increase            | 0.48 (0.36-0.60)      | <0.001  |

<sup>a</sup>Each biomarker was evaluated in a separate model that includes the listed clinical characteristics in addition to log-transformed suPAR (base 2). <sup>b</sup>Serum creatinine-derived eGFR measured at the time of suPAR sample collection. eGFR: estimated glomerular filtration rate. C-reactive protein levels were available in 301 participants, ferritin in 207 participants, D-dimer in 204 participants and lactate dehydrogenase in 256 participants.

**Table S6. Determinants of incident acute kidney injury and need for dialysis in hospitalized patients with COVID-19 after excluding 25 patients with suPAR levels measured 24-48 hours after admission.**

|                                                 | Acute kidney injury (n=82) |         | Renal replacement therapy (n=22) |         |
|-------------------------------------------------|----------------------------|---------|----------------------------------|---------|
|                                                 | OR, 95%CI                  | P-value | OR, 95%CI                        | P-value |
| <b>Model 0: Clinical Characteristics</b>        |                            |         |                                  |         |
| Age, per 10 years                               | 0.99 (0.97-1.01)           | 0.38    | 0.93 (0.89-0.98)                 | 0.003   |
| Male                                            | 0.32 (0.17-0.59)           | <0.001  | 0.57 (0.19-1.71)                 | 0.32    |
| Black                                           | 1.96 (0.84-4.56)           | 0.12    | 2.20 (0.29-16.65)                | 0.45    |
| Institution (US vs. Europe)                     | 0.53 (0.27-1.05)           | 0.07    | 14.01 (2.07-94.97)               | 0.01    |
| Body mass index, per 5 kg/m <sup>2</sup>        | 0.99 (0.80-1.23)           | 0.93    | 0.87 (0.55-1.36)                 | 0.53    |
| Diabetes mellitus                               | 1.39 (0.73-2.67)           | 0.32    | 3.87 (1.19-12.63)                | 0.03    |
| Hypertension                                    | 1.15 (0.59-2.26)           | 0.68    | 1.61 (0.44-5.93)                 | 0.48    |
| Coronary artery disease                         | 0.76 (0.27-2.09)           | 0.59    | 1.04 (0.16-6.60)                 | 0.97    |
| Congestive heart failure                        | 1.11 (0.38-3.25)           | 0.85    | 0.41 (0.04-4.52)                 | 0.47    |
| eGFR, per 5 ml/min/1.73 m <sup>2</sup>          | 0.97 (0.96-0.99)           | <0.001  | 0.96 (0.93-0.98)                 | <0.001  |
| Oxygen saturation, per 1 % increase             | 0.96 (0.92-1.00)           | 0.07    | 0.90 (0.84-0.96)                 | 0.001   |
| <b>Model 1: SuPAR as a continuous variable</b>  |                            |         |                                  |         |
| SuPAR, per 100% increase <sup>b</sup>           | 2.47 (1.58-3.84)           | <0.001  | 3.66 (1.78-7.52)                 | <0.001  |
| <b>Model 2: SuPAR as a categorical variable</b> |                            |         |                                  |         |
| SuPAR <4.60 ng/ml (Tertile 1)                   | -                          | -       | -                                | -       |
| SuPAR 4.60-6.86 ng/ml (Tertile 2)               | 5.58 (2.05-15.16)          | 0.001   | 14.32 (1.17-176.07)              | 0.038   |
| SuPAR ≥6.57 ng/ml (Tertile 3)                   | 8.60 (3.10-23.91)          | <0.001  | 48.86 (4.06-587.46)              | 0.002   |

<sup>a</sup>Each biomarker was evaluated in a separate model that includes the listed clinical characteristics in addition to suPAR. <sup>b</sup>Serum creatinine-derived eGFR measured at the time of suPAR sample collection was used in Model 1 assessing the association between suPAR and acute kidney injury. eGFR: estimated glomerular filtration rate measured at the time of suPAR collection.
